# Supplementary material for: Omega-3 PUFAs prevent bone impairment and bone marrow adiposity in mouse model of obesity
Source: PubMed Central journal article supplement (PMC10575870; doi:10.1038/s42003-023-05407-8), 2023-10-14
Supplement: 42003_2023_5407_MOESM2_ESM.pdf [file 42003_2023_5407_MOESM2_ESM.pdf]

## **SUPPLEMENTARY INFORMATION**

### **CONTENT:**

Supplementary Tables: Supplementary Table 1-4

Supplementary Figures with figure legends: Supplementary Figure S1-10

## SUPPLEMENTARY TABLES

**Supplementary Table 1:** Macronutrient composition and energy content in the experimental diets.

|                                      | <b>ND</b> | <b>HFD</b> | <b>HFD+F</b> |
|--------------------------------------|-----------|------------|--------------|
| <b>Lipids (% diet, wt/wt)</b>        | 2.9       | 31.8       | 32.4         |
| <b>Carbohydrates (% diet, wt/wt)</b> | 64.3      | 47.2       | 47.6         |
| <b>Proteins (% diet, wt/wt)</b>      | 16.9      | 11.7       | 11.7         |
| <b>Energy density (kJ/g)</b>         | 13.0      | 20.1       | 20.1         |
|                                      |           |            |              |
| <b>Supplement:</b>                   |           |            |              |
| <b>Epax 1050 TG (g/100g)</b>         | 0.0       | 0.0        | 5.3          |

**Supplementary Table 2: Fatty acid composition of dietary lipids**

| <i>(mol %)</i> | <b>ND</b> | <b>HFD</b> | <b>HFD+F</b> |
|----------------|-----------|------------|--------------|
| 12:0           | 0.15      | 0.26       | -            |
| 14:0           | 0.14      | 1.22       | -            |
| 16:0           | 12.52     | 13.42      | 12.05        |
| 16:1 (n-9)     | -         | -          | -            |
| 16:1 (n-7)     | 0.32      | 0.26       | 0.31         |
| 18:0           | 6.00      | 3.34       | 3.84         |
| 18:1 (trans)   | 0.55      | 0.42       | 0.45         |
| 18:1 (n-9)     | 25.64     | 31.00      | 28.44        |
| 18:1 (n-7)     | 1.59      | 0.65       | 0.87         |
| 18:2 (n-6)     | 46.62     | 47.22      | 41.10        |
| 18:3 (n-6)     | -         | -          | -            |
| 20:0           | 0.42      | 0.43       | 0.50         |
| 18:3 (n-3)     | 4.89      | 1.24       | 1.24         |
| 20:1 (n-9)     | 0.31      | 0.26       | 0.47         |
| 20:2 (n-6)     | -         | -          | 0.14         |
| 20:3 (n-6)     | -         | -          | -            |
| 20:4 (n-6)     | -         | -          | 0.47         |
| 20:5 (n-3)     | -         | -          | 1.65         |
| 22:4 (n-6)     | -         | -          | 0.12         |
| 22:5 (n-6)     | -         | -          | 0.48         |
| 22:5 (n-3)     | -         | -          | 0.34         |
| 22:6 (n-3)     | 0.45      | -          | 6.39         |
| SFA            | 23.71     | 19.48      | 18.14        |
| MUFA           | 27.92     | 32.26      | 30.18        |
| n-6 PUFA       | 46.86     | 47.34      | 42.35        |
| n-3 PUFA       | 0.97      | 0.49       | 8.87         |

Fatty acid composition in total dietary lipids was determined using gas chromatography.

SFA, saturated fatty acid; MUFA, monounsaturated fatty acid. -, <0.1 %.

**Supplementary Table 3: List of mouse primers**

| <b>Gene name</b>               | <b>Gene Sequence 5'-3'</b> |
|--------------------------------|----------------------------|
| <i>36B4 F</i>                  | TCCAGGCTTTGGGCATCA         |
| <i>36B4 R</i>                  | CTTTATCAGCTGCACATCACTCAGA  |
| <i>Fsp27 F</i>                 | ATCAGAACAGCGCAAGAAGA       |
| <i>Fsp27 R</i>                 | CAGCTTGTACAGGTCGAAGG       |
| <i>Cd36 F</i>                  | ATGGGCTGTGATCGGAACTG       |
| <i>Cd36 R</i>                  | TTTGCCACGTCATCTGGGTTT      |
| <i>Alpl F</i>                  | GCCCTCTCCAAGACATATA        |
| <i>Alpl R</i>                  | CCATGATCACGTCGATATCC       |
| <i>Bmp2 F</i>                  | GGGACCCGCTGTCTTCTAGT       |
| <i>Bmp2 R</i>                  | TCAACTCAAATTCGCTGAGGAC     |
| <i>Colla1 F</i>                | GGTGAACAGGGGTTCCCTGG       |
| <i>Colla1 R</i>                | TTCGCACCAGGTTGCCATC        |
| <i>Adipoq F</i>                | GACGTTACTACAACCTGAAGAGC    |
| <i>Adipoq R</i>                | CATTCTTTTCTGATACTGGTC      |
| <i>Cebpa F</i>                 | AAGCCAAGAAGTCGGTGGA        |
| <i>Cebpa R</i>                 | CAGTTCACGGCTCAGCTGTTC      |
| <i>Il1<math>\beta</math> F</i> | GCAACTGTTCCTGAACTCAACT     |
| <i>Il1<math>\beta</math> R</i> | ATCTTTTGGGGTCCGTCAACT      |
| <i>Tnfa F</i>                  | CCCTCACACTCAGATCATCTTCT    |
| <i>Tnfa R</i>                  | GCTACGACGTGGGCTACAG        |
| <i>p53 F</i>                   | TCTTATCCGGGTGGAAGGAAA      |
| <i>p53 R</i>                   | GGCGAAAAGTCTGCCTGTCTT      |
| <i>p16 F</i>                   | GGGTTTTCTTGGTGAAGTTCG      |
| <i>p16 R</i>                   | TTGCCATCATCATCACCT         |
| <i>Sod2 F</i>                  | CAGACCTGCCTTACGACTATGG     |
| <i>Sod2 R</i>                  | CTCGGTGGCGTTGAGATTGTT      |
| <i>Hmox1 F</i>                 | AGGTACACATCCAAGCCGAGA      |
| <i>Hmox1 R</i>                 | CATCACCAGCTTAAAGCCTTCT     |

|                 |                           |
|-----------------|---------------------------|
| <i>Ppary2 F</i> | GGGTCAGCTCTTGTGAATGG      |
| <i>Ppary2 R</i> | CTGATGCACTGCCTATGAGC      |
| <i>Oc F</i>     | TGCGCTCTGTCTCTCTGACC      |
| <i>Oc R</i>     | CTGTGACATCCATACTTGCAGG    |
| <i>p21 F</i>    | CCTGGTGATGTCCGACCTG       |
| <i>p21 R</i>    | CCATGAGCGCATCGCAATC       |
| <i>Trap F</i>   | CAGCTCCCTAGAAGATGGATTTCAT |
| <i>Trap R</i>   | GTCAGGAGTGGGAGCCATATG     |
| <i>Rankl F</i>  | AGCCGAGACTACGGCAAGTA      |
| <i>Rankl R</i>  | AAAGTACAGGAACAGAGCGATG    |
| <i>Rela F</i>   | ACTGCCGGGATGGCTACTAT      |
| <i>Rela R</i>   | TCTGGATTTCGCTGGCTAATGG    |
| <i>Opg F</i>    | CCTTGCCCTGACCACTCTTAT     |
| <i>Opg R</i>    | CACACACTCGGTTGTGGGT       |
| <i>Ctsk F</i>   | AGGCAGCTAAATGCAGAGGGTACA  |
| <i>Ctsk R</i>   | AGCTTGCATCGATGGACACAGAGA  |
| <i>Ctnnb1 F</i> | CCCAGTCCTTCACGCAAGAG      |
| <i>Ctnnb1 R</i> | CATCTAGCGTCTCAGGGAACA     |
| <i>Vegfa F</i>  | GTACCTCCACCATGCCAAGTG     |
| <i>Vegfa R</i>  | TGGGACTTCTGCTCTCCTTCTG    |
| <i>Vcam F</i>   | GGCTCCAGACATTTACCCAGTT    |
| <i>Vcam R</i>   | CATGAGCTGGTCACCCTTGAA     |
| <i>Fas F</i>    | CTGCACCCTGACCCAGAATAC     |
| <i>Fas R</i>    | ACAGCCAGGAGAATCGCAGTA     |
| <i>Fasgl F</i>  | CAGTCCACCCCCTGAAAAAAAA    |
| <i>Fasgl R</i>  | CCTTGAGTTGGACTTGCCTGTT    |
| <i>Il10 F</i>   | CTGGACAACATACTGCTAACCG    |
| <i>Il10 R</i>   | GGGCATCACTTCTACCAGGTAA    |
| <i>Il1rn F</i>  | GCTCATTGCTGGGTACTTACAA    |
| <i>Il1rn R</i>  | CCAGACTTGGCACAAGACAGG     |

**Supplementary Table 4.** List of primary and secondary antibodies used for western blot

| <b>Primary antibodies</b>                  | <b>Catalog #</b> | <b>Company</b> | <b>Dilution</b> |
|--------------------------------------------|------------------|----------------|-----------------|
| Phospho-Akt Ser473_Rabbit                  | #4058 (193H12)   | Cell Signaling | 1:1000          |
| Phospho-Akt Thr308_Rabbit                  | #13038 (D25E6)   | Cell Signaling | 1:1000          |
| Total AKT_Rabbit                           | #9272            | Cell Signaling | 1:1000          |
| $\beta$ -actin_Rabbit                      | #4970 (13E5)     | Cell Signaling | 1:1000          |
| Phospho-NF-kB p65_Rabbit                   | #3031            | Cell Signaling | 1:1000          |
| NF-kB p65_Rabbit                           | #8242 (D14E12)   | Cell Signaling | 1:1000          |
| <b>Secondary HRP-conjugated antibodies</b> |                  |                |                 |
| Anti-rabbit IgG, HRP-linked Antibody       | #7074            | Cell Signaling | 1:5000          |

## Supplementary Fig. 1

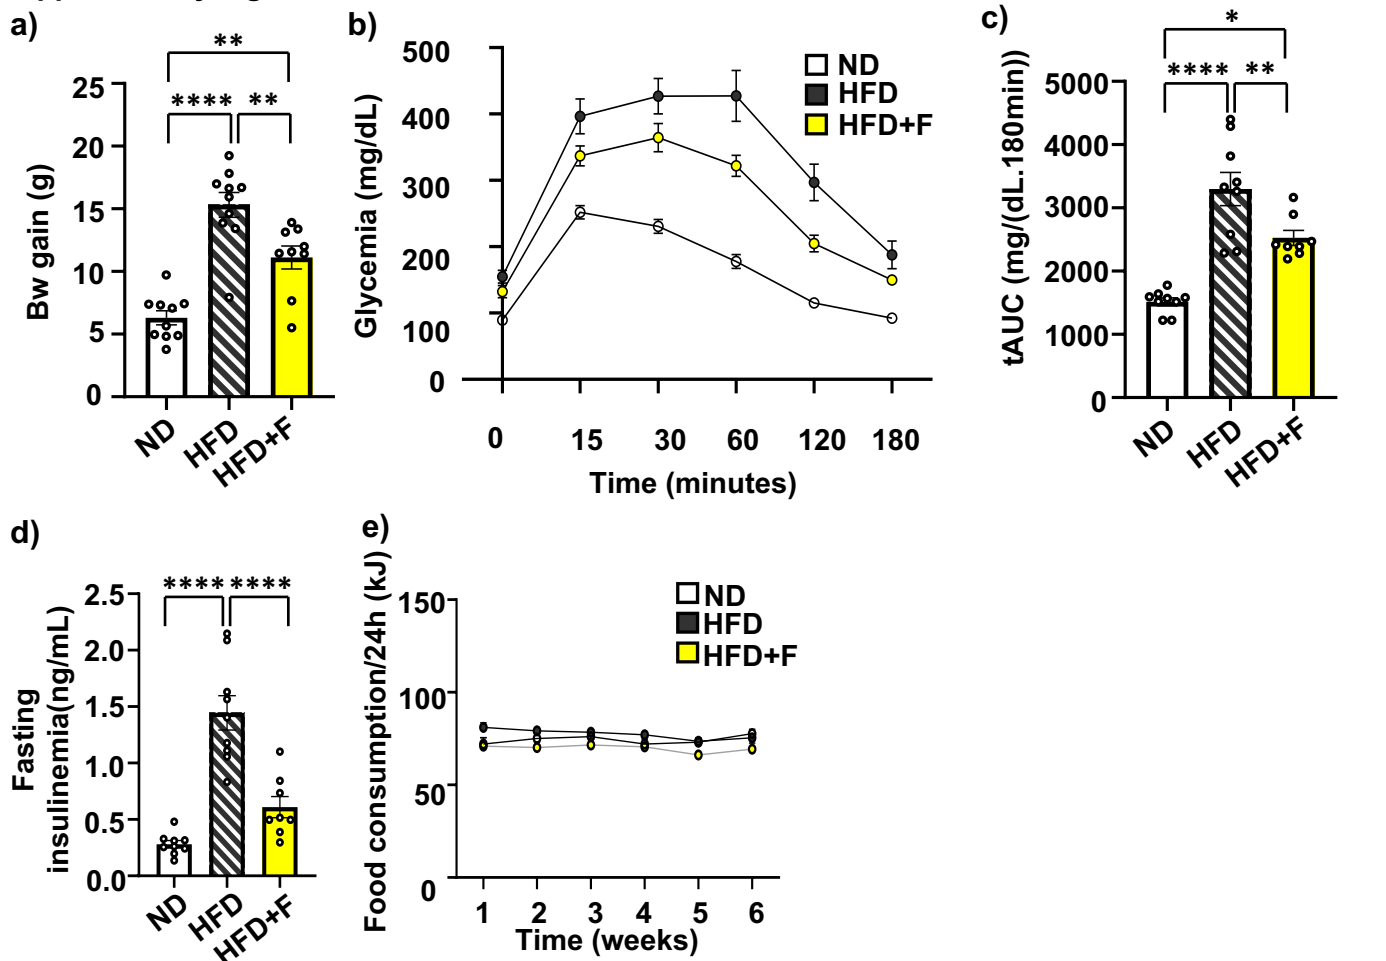

### Supplementary Fig. 1 legend: Metabolic parameters of investigated mice.

(a-d) Omega-3 PUFAs improve metabolic parameters in HFD mice. (a) Body weigh gain, (b) measurement of intraperitoneal glucose tolerance test (GTT) in treated mice at the end of dietary intervention after overnight fasting (groups coding: white circle-ND, black circle-HFD, yellow circle-HFD+F), (c) area under the curve of coresponding GTT graphs; (d) insulinemia after overnight fasting at the end of dietary intervention in treated mice (n= 7-10). (e) Food intake (kJ) in treated mice during dietary intervention (n=7-10). Data are presented as mean  $\pm$  SEM (n = 6-8 per group); one-way ANOVA, Tukey's multiple comparison test with \*  $p \leq 0.05$ , \*\*  $p \leq 0.01$ , \*\*\*\*  $p \leq 0.0001$ . (groups coding: white column-ND, black line shading-HFD, yellow column-HFD+F)

**Supplementary Fig. 2**

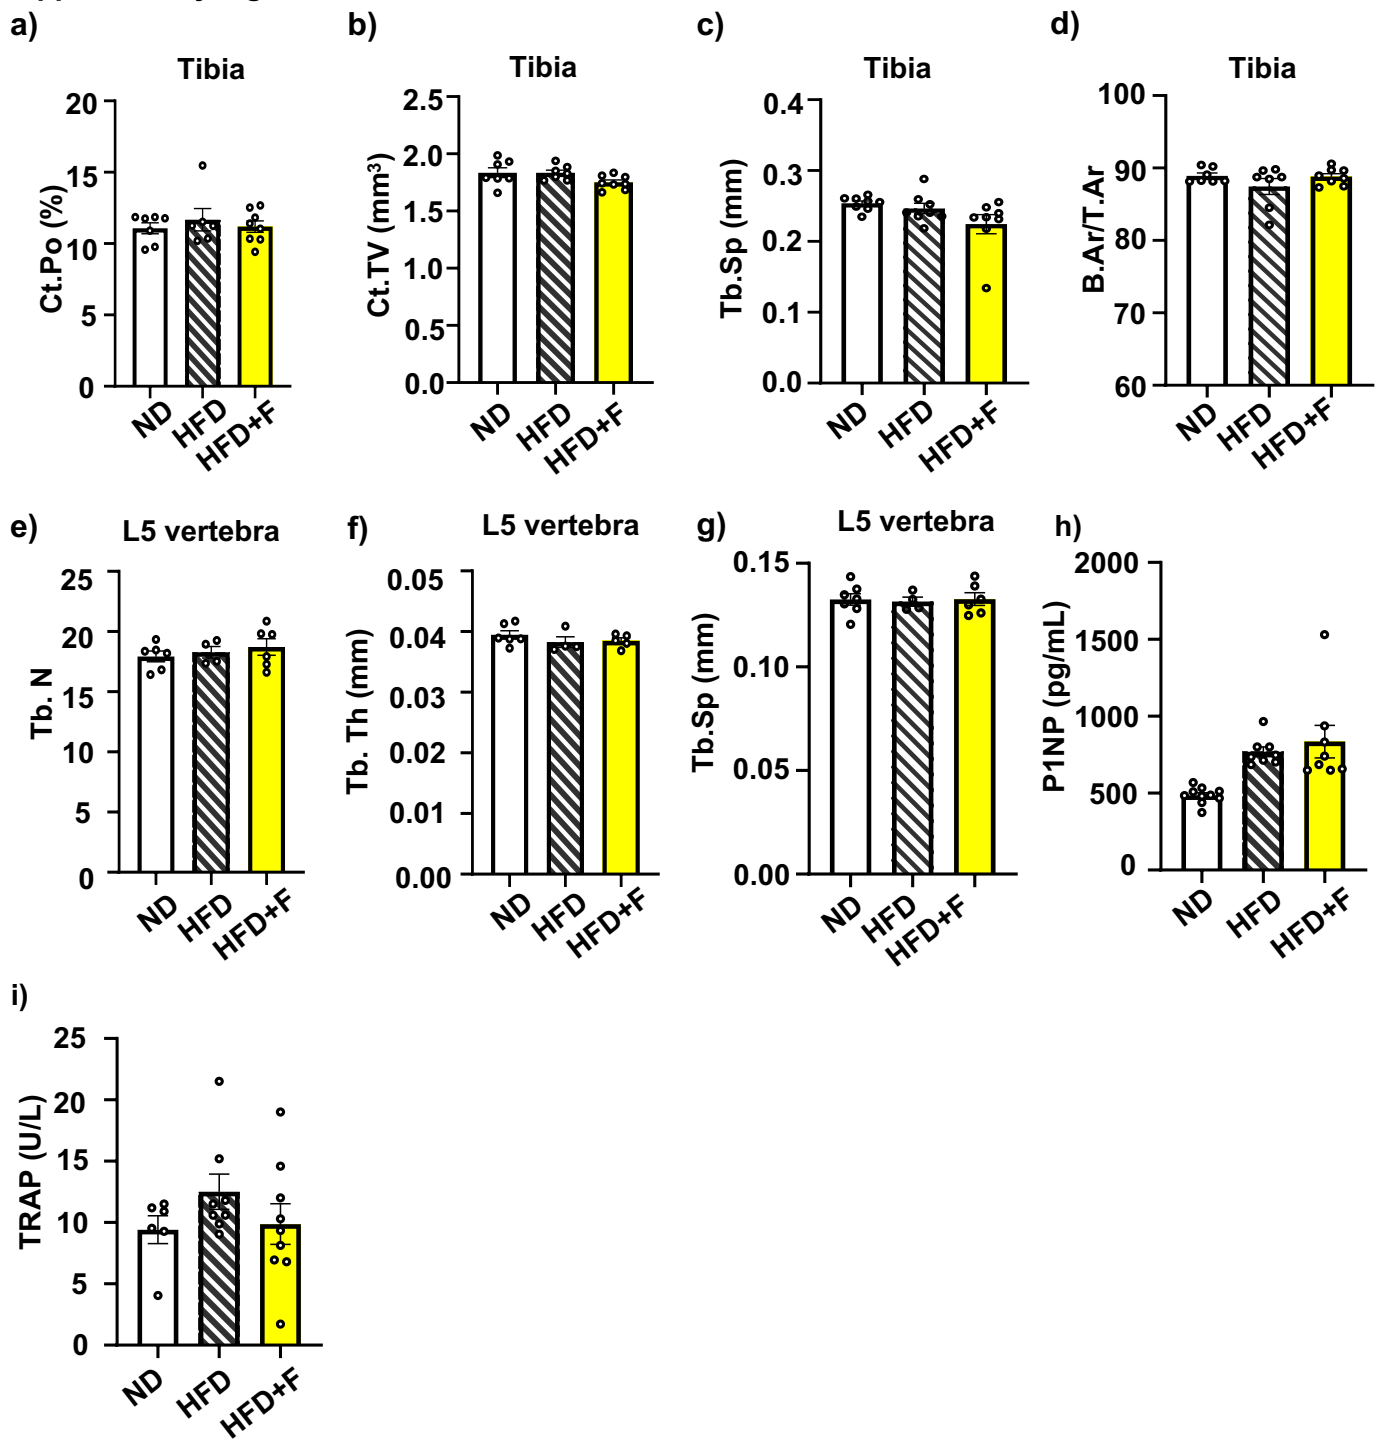

**Supplementary Fig. 2 legend: Bone parameters of investigated mice.**

(a-d) Evaluation of bone parameters in tibia: (a) Cortical porosity (Ct.Po), (b) Cortical total volume (Ct.TV); (c) trabecular separation (Tb.Sp) and (d) cortical area fraction (B.Ar/T.Ar) in treated mice (n= 7-10). (e-g) Evaluation of bone parameters in L5 vertebra: (e) Trabecular number (Tb.N), (f) trabecular thickness (Tb.Th), (g) trabecular separation (Tb.Sp). Analysis of circulating (h) bone formation marker P1NP (pg/mL) and (i) bone resorption marker TRAP (U/L). Data are presented as mean ± SEM (n = 6-8 per group); one-way ANOVA, Tukey's multiple comparison test with \* p ≤ 0.05. (groups coding: white column-ND, black line shading-HFD, yellow column-HFD+F)



### Supplementary Fig. 3

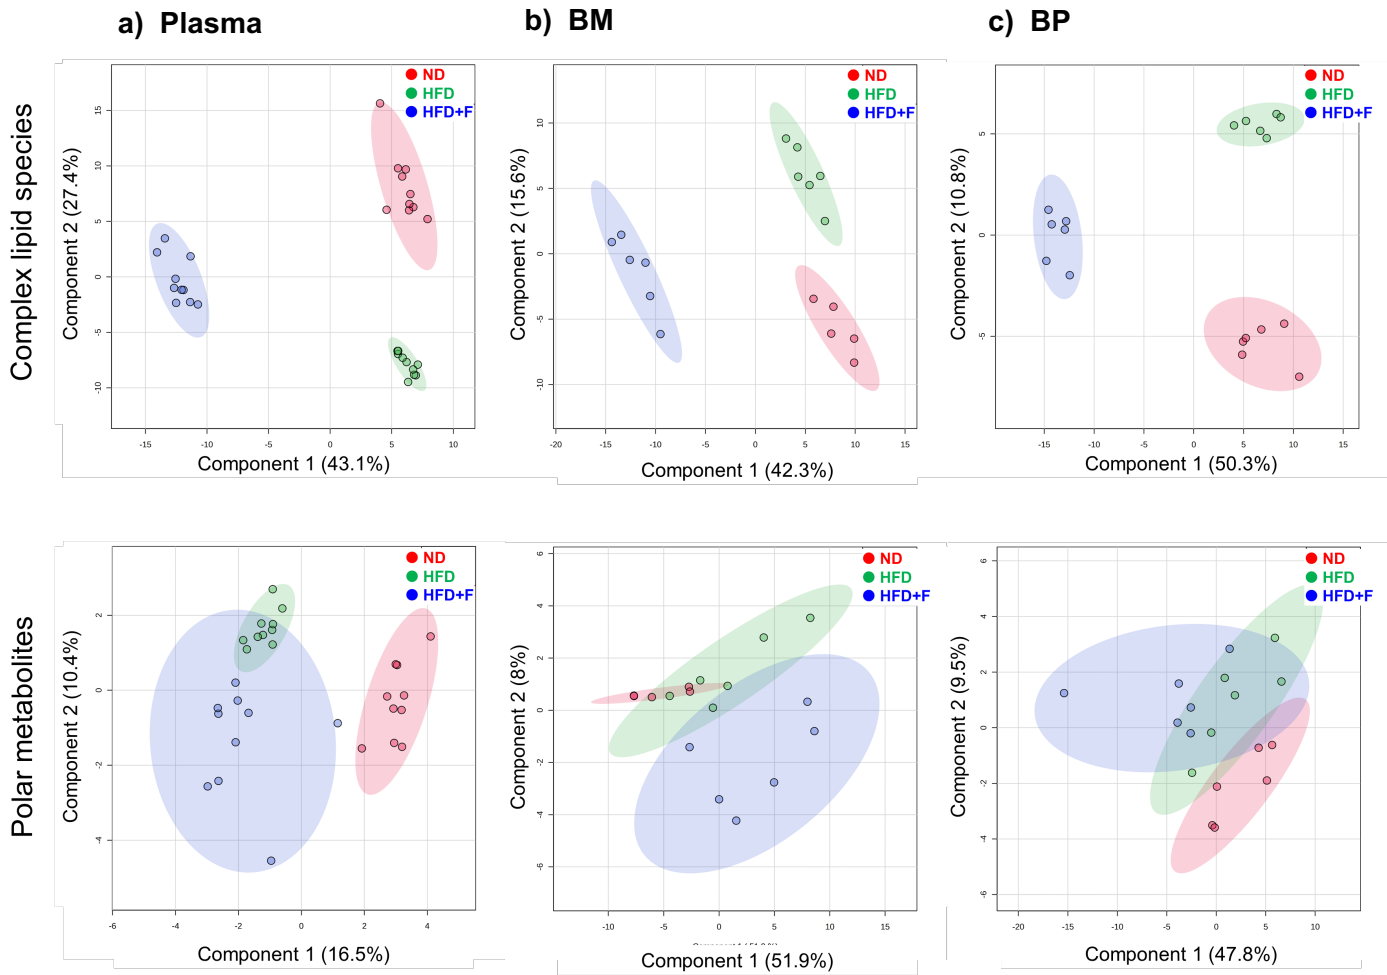

**Supplementary Fig. 3 legend: Metabolomic analysis of plasma, bone marrow (BM) and bone powder samples obtained from investigated mice.**

PLS-DA score plots of unique lipid species (top panels) and polar metabolites (bottom panels) for (a) plasma, (b) bone marrow, and (c) bone powder samples.

## Plasma

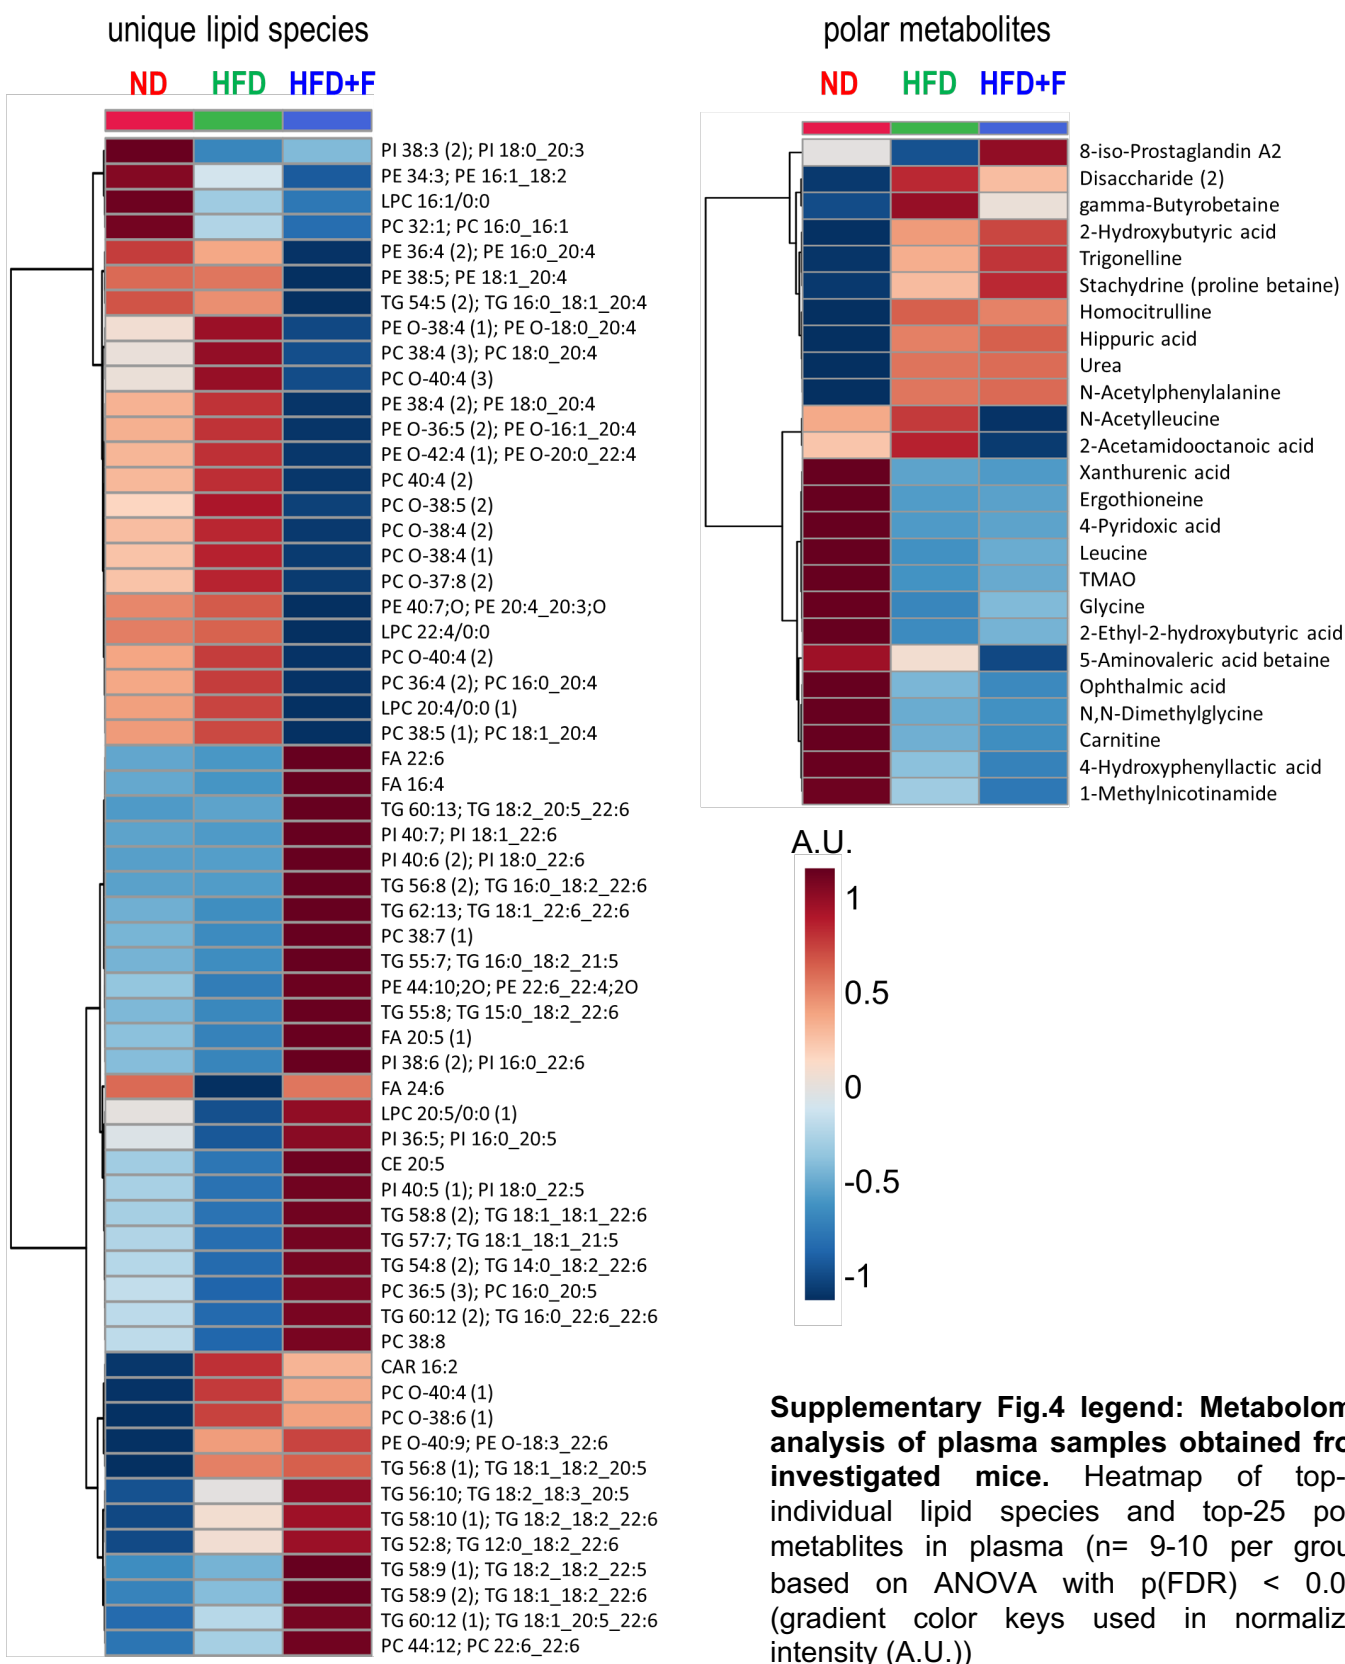

## BM

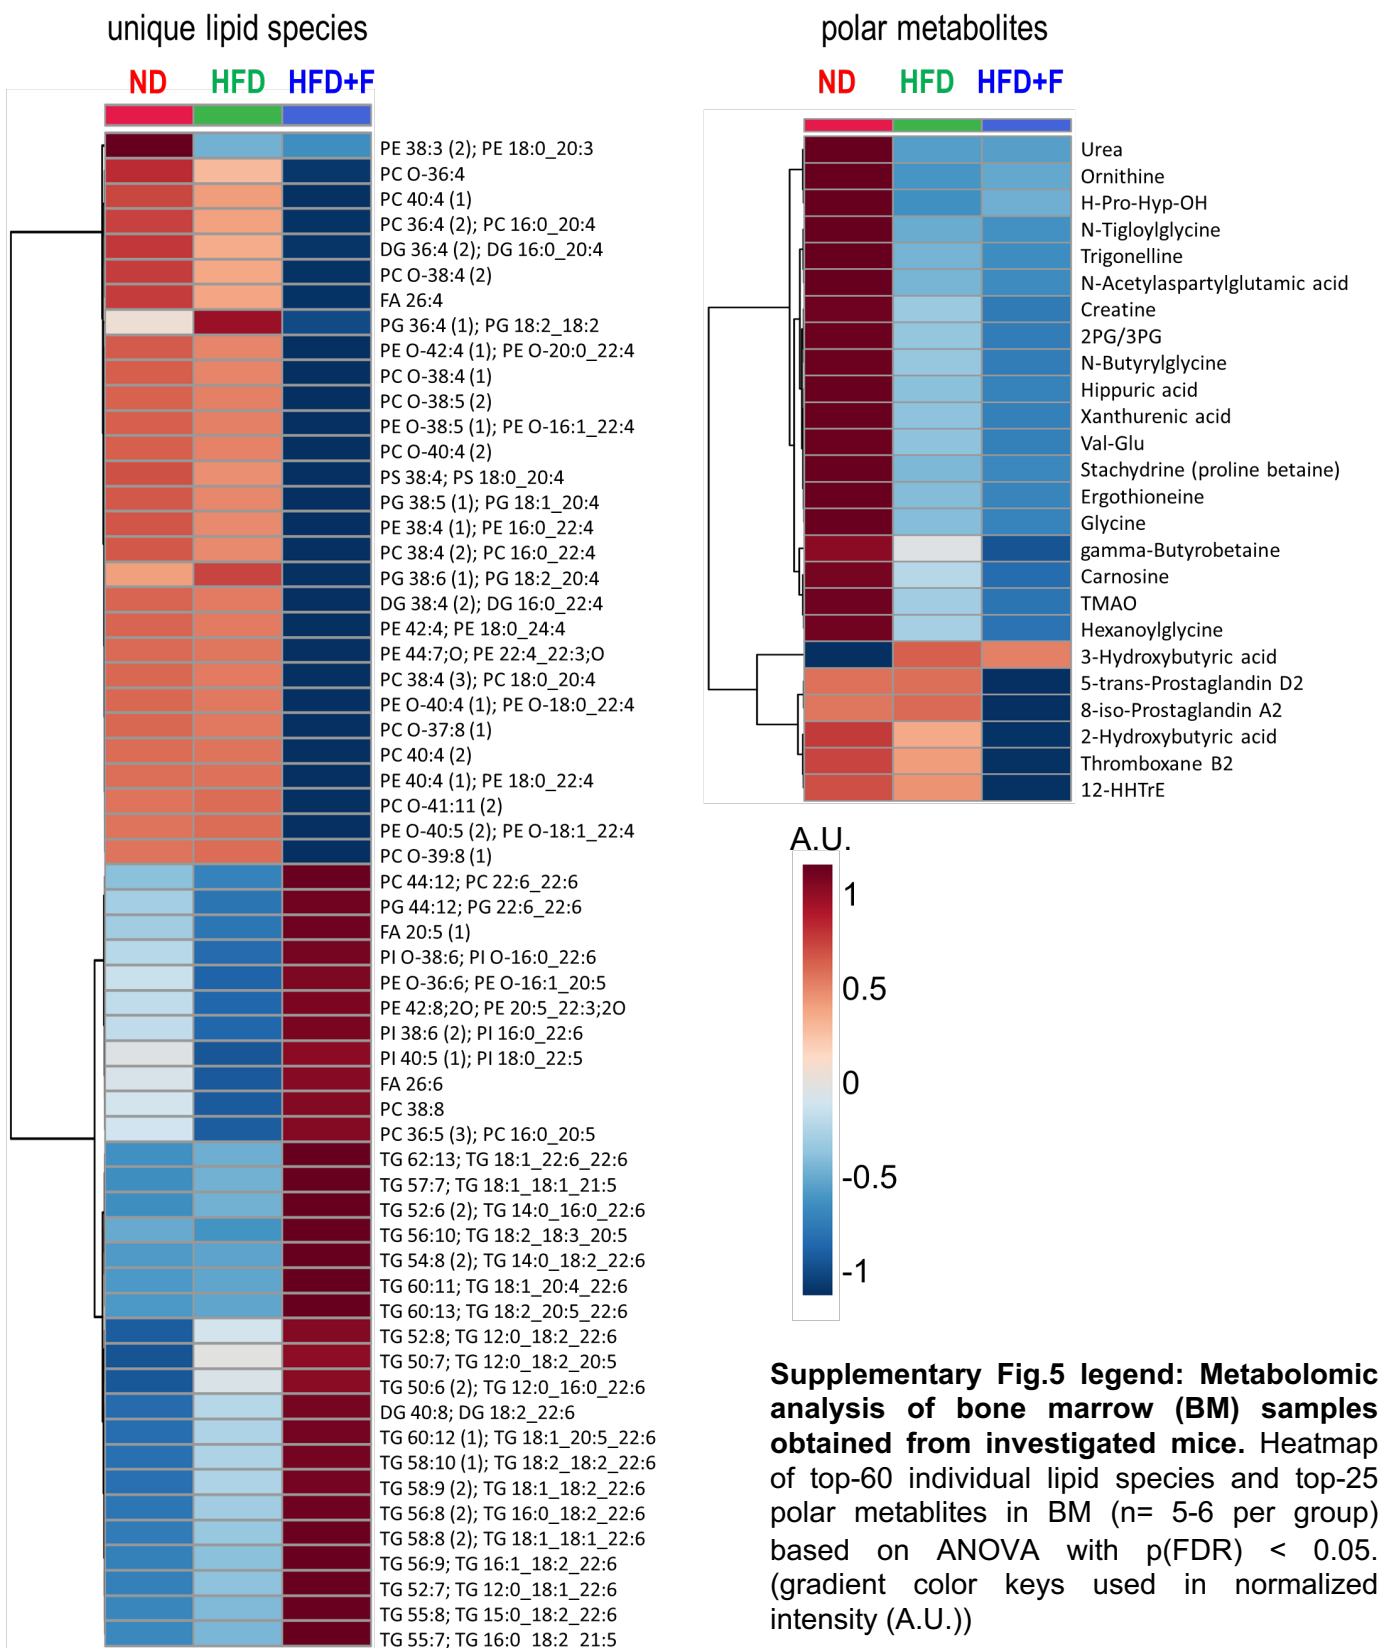

## BP

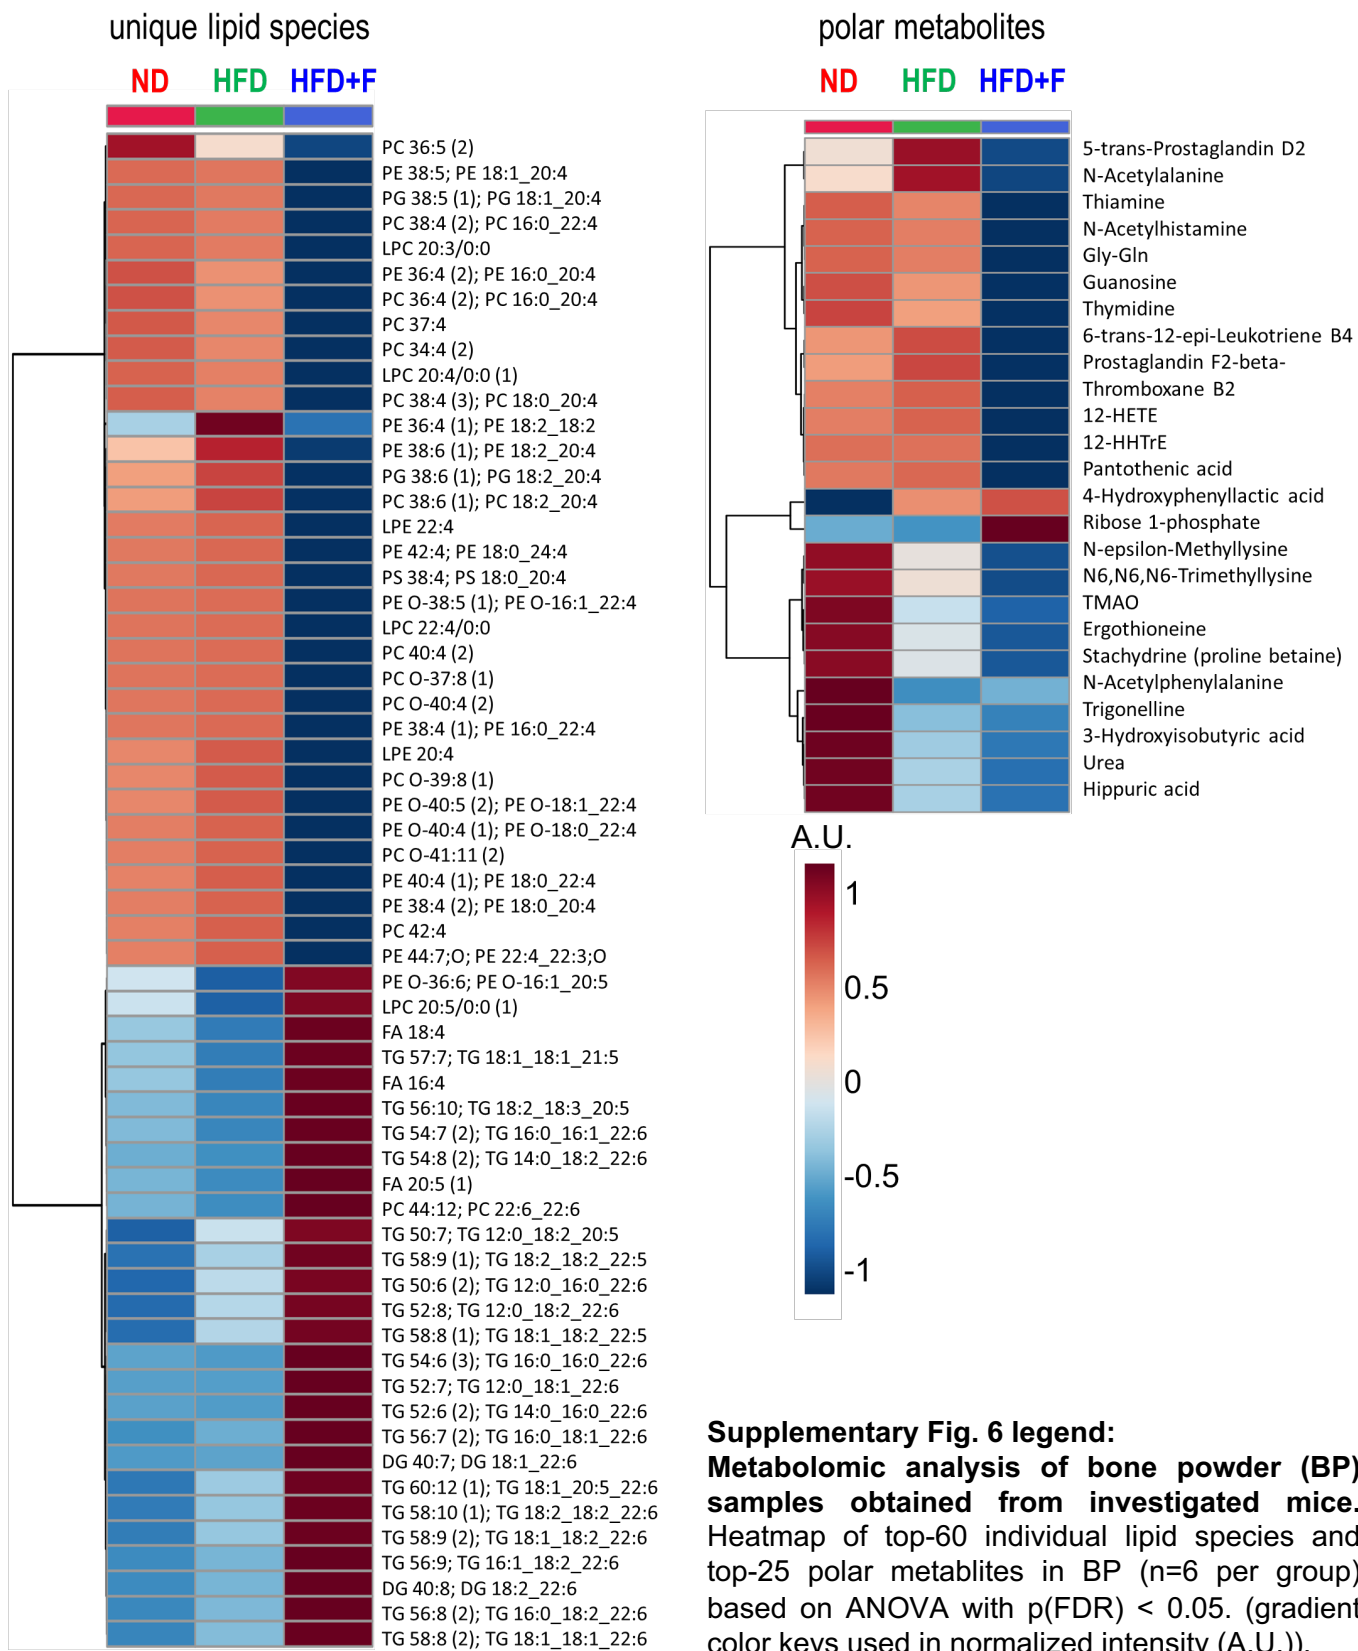

Supplementary Fig. 7

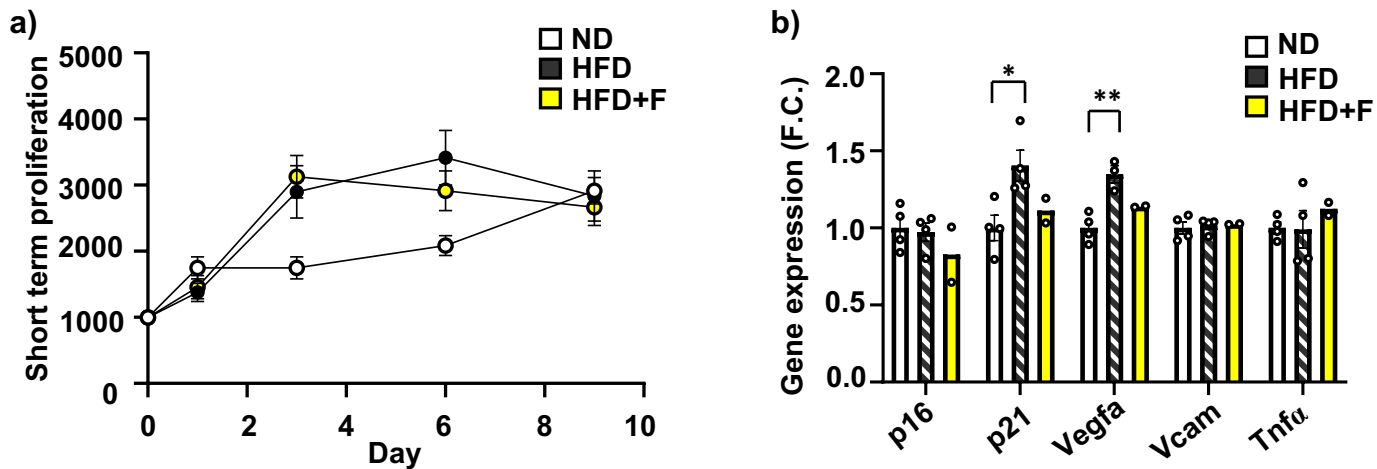

**Supplementary Fig. 7 legend: Cellular characteristics of bone cells obtained from the treated mice.** (a) Short-term proliferation assay of primary BMSCs calculated after 1, 3, 6 and 9 days in culture after seeding (n = 3 per group) (groups coding: white circle-ND, black circle-HFD, yellow circle-HFD+F). (b) Gene expression of senescence genes (*p16*, *p21*, *Vegfa*, *Vcam*, *Tnfa*) measured in mouse HSCs. Data are presented as mean  $\pm$  SEM (n = 4 per group); one-way ANOVA, Tukey's multiple comparison test, \* p  $\leq$  0.05, \*\* p  $\leq$  0.01. (groups coding: white column-ND, black line shading-HFD, yellow column-HFD+F)

Supplementary Fig. 8

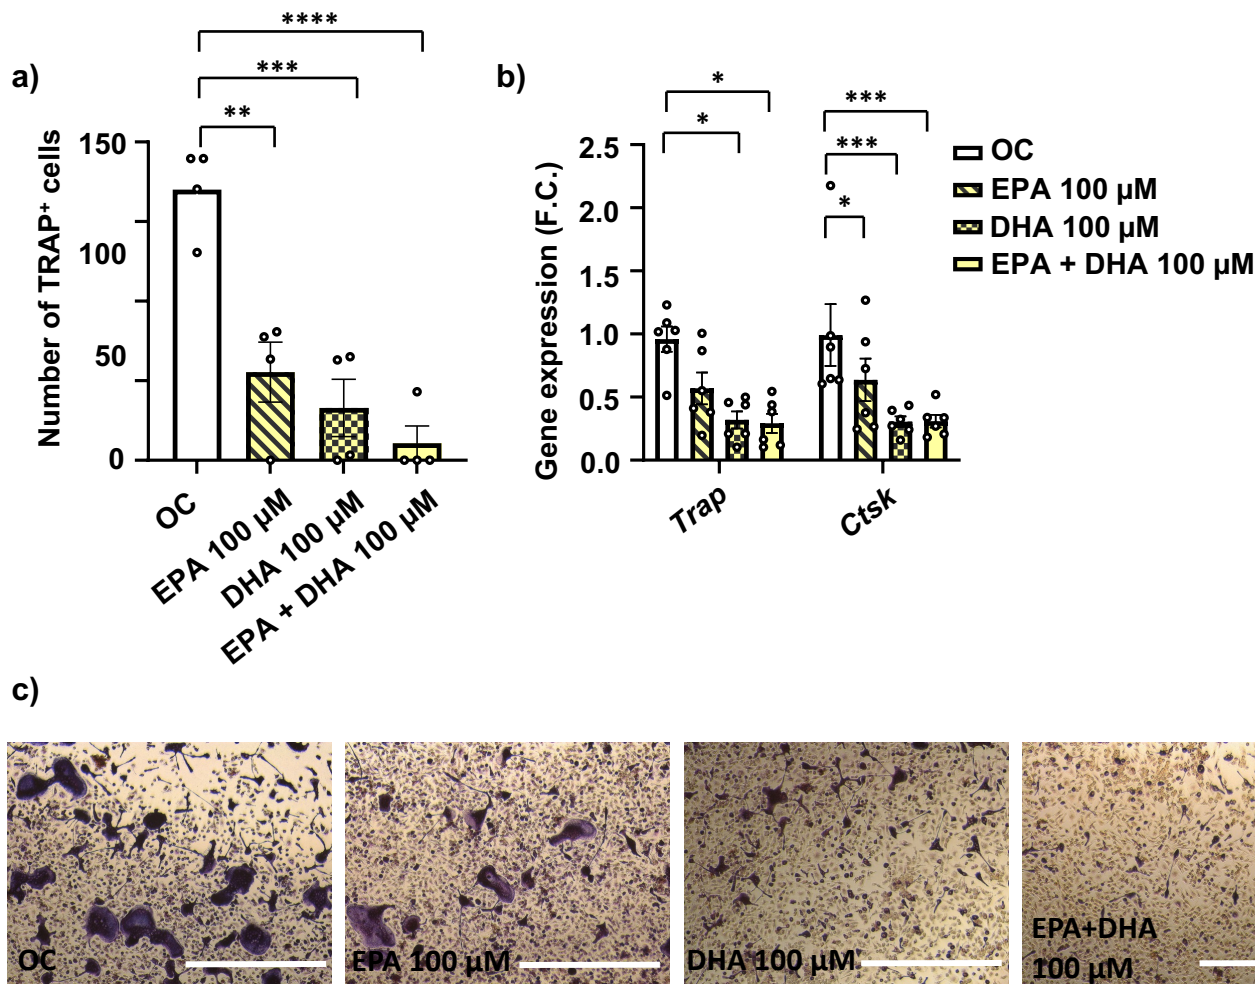

**Supplementary Fig. 8 legend: The effect of omega-3 PUFA treatment in vitro on osteoclast differentiation**

(a) Number of TRAP+ cells after 5 days of differentiation with omega-3 PUFA short term supplementation (n = 4 per group). (b) Gene expression of osteoclastic genes (*Trap*, *Ctsk*) measured in Ocs after 5 days differentiation. Data are presented as mean ± SEM (n = 6 per group); one-way ANOVA, Tukey's multiple comparison test, \*\*p ≤ 0.01, \*\*\* p ≤ 0.001, \*\*\*\*p ≤ 0.0001. (c) Representative pictures of TRAP+ differentiated OCs after 5 days of differentiation with omega-3 PUFAs (scale bar 250 μm). (groups coding: white column-ND, black line shading-HFD, yellow column-HFD+F)

## Supplementary Fig. 9

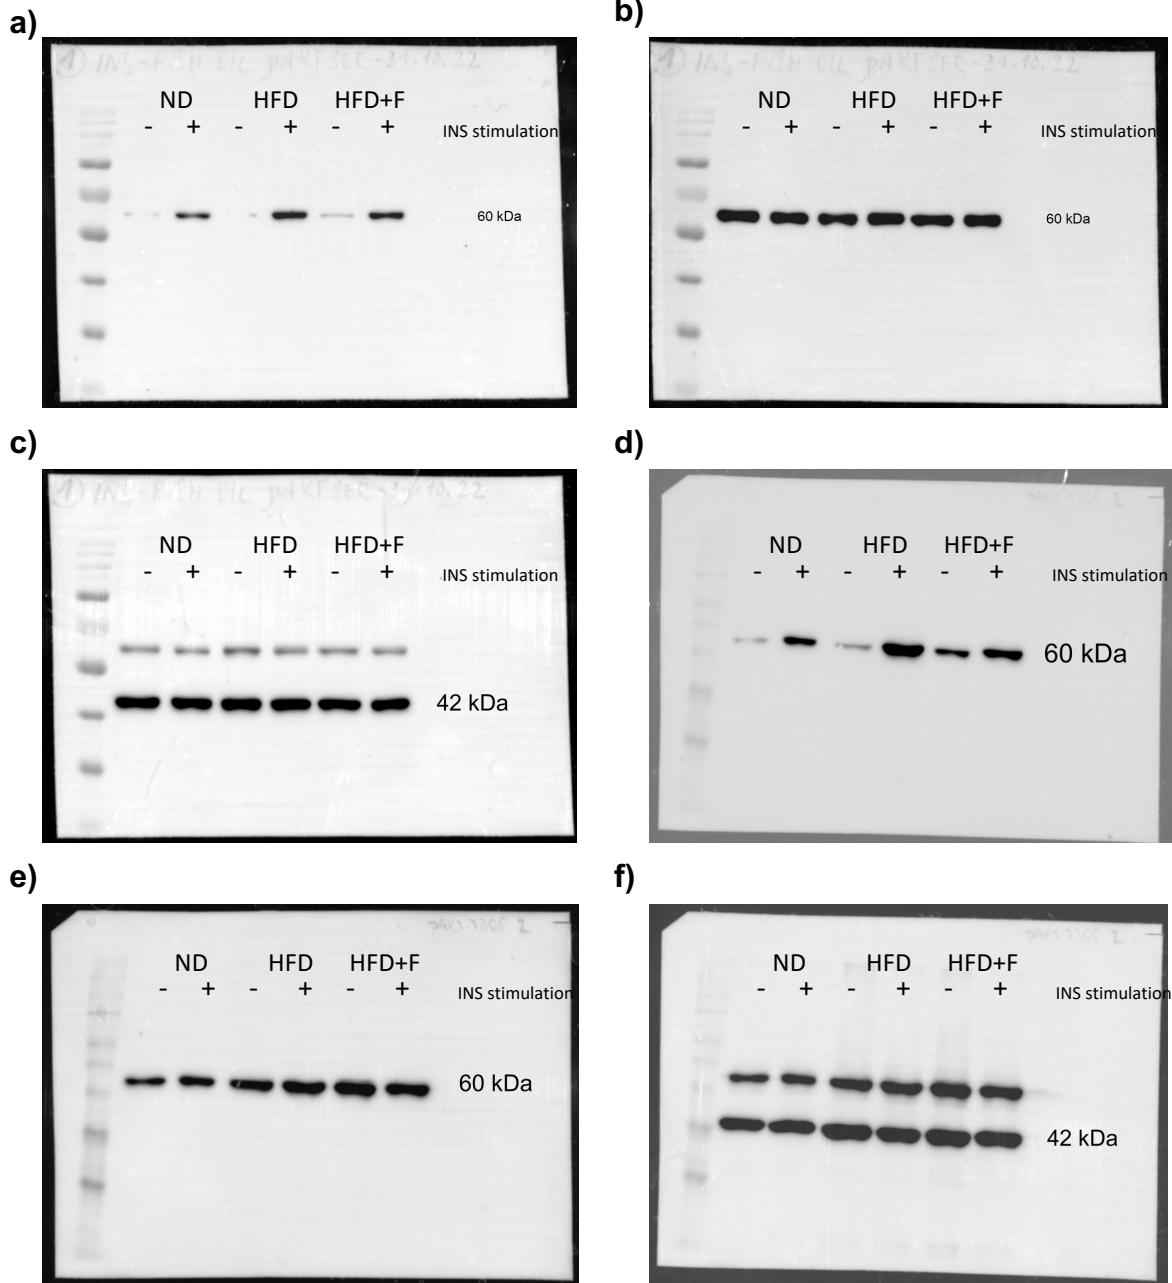

**Supplementary Fig. 9 legend: Uncropped western blot membrane images corresponding to Fig.6b and Fig. 6d**

(a) p-S473-AKT, (b) total AKT and corresponding (c)  $\beta$ -actin. (e) p-T308-AKT, (f) total AKT and corresponding (g)  $\beta$ -actin.

**Supplementary Fig. 10**

**a)**

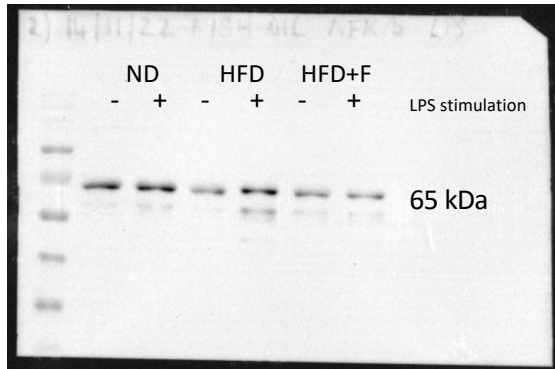

**b)**

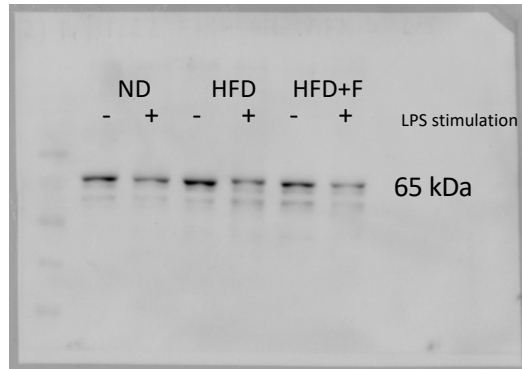

**c)**

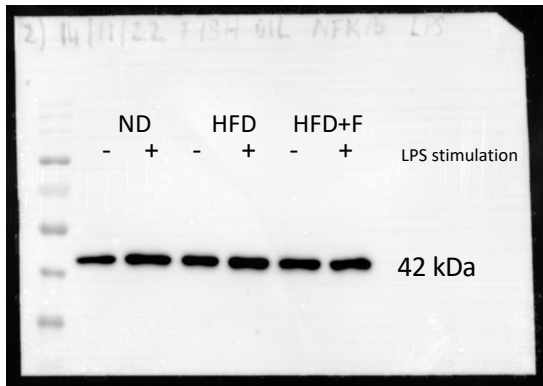

**Supplementary Fig. 10 legend: Uncropped western blot membrane images corresponding to Fig. 6f. (a) p-NFκB, (b) total NFκB and corresponding (c) β-actin.**
