# Supplementary material for: Omega-3 PUFAs prevent bone impairment and bone marrow adiposity in mouse model of obesity
Source: PubMed Central journal article supplement (PMC10575870; doi:10.1038/s42003-023-05407-8), 2023-10-14
Supplement: 42003_2023_5407_MOESM3_ESM.pdf [file 42003_2023_5407_MOESM3_ESM.pdf]

## Description of Additional Supplementary Files

**File Name:** Supplementary Data 1

**Description:** Source data underlying main figures.
